# Supplementary material for: Pilot, double-blind, randomized, placebo-controlled clinical trial of the supplement food Nyaditum resae® in adults with or without latent TB infection: Safety and immunogenicity
Source: PubMed Central journal article supplement (PMC5300153; doi:10.1371/journal.pone.0171294), 2017-02-09
Supplement: pone.0171294.s003.pdf [file pone.0171294.s003.pdf]

ID PACIENTE | | | | | | | |

# NYADATREG

**ENSAYO CLÍNICO PILOTO, DOBLE-CIEGO, ALEATORIZADO, CONTROLADO CON PLACEBO PARA EVALUAR LA TOLERABILIDAD Y INMUNOGENICIDAD DEL PROBIÓTICO NYADITUM RESAE® ADMINISTRADO EN ADULTOS CON O SIN INFERCCIÓN TUBERCULOSA LATENTE.**

Versión 1, 22 de Octubre de 2013

## Cuaderno Recogida Datos

**Promotor:**

Manresana de Micobacteriologia, SL.  
C/ Urgell nº 26,1  
08240-Manresa

|                    |  |  |  |  |  |  |  |  |  |
|--------------------|--|--|--|--|--|--|--|--|--|
| <b>ID PACIENTE</b> |  |  |  |  |  |  |  |  |  |
|--------------------|--|--|--|--|--|--|--|--|--|

**Datos demográficos**

Fecha de nacimiento: \_\_\_ / \_\_\_ / \_\_\_\_\_  
 Fecha de obtención del consentimiento: \_\_\_ / \_\_\_ / \_\_\_\_\_  
 Sexo:  Hombre       Mujer

**Test VIH**

Fecha de extracción: \_\_\_ / \_\_\_ / \_\_\_\_\_ Resultado:  Positivo       Negativo

**Test embarazo en orina**

Fecha de extracción: \_\_\_ / \_\_\_ / \_\_\_\_\_, Resultado:  Positivo       Negativo

**Antecedentes**

¿Tiene el paciente alguna enfermedad actual o previa relevante?  Sí       No

Procesos del último año **(Si la respuesta es Si, anótelas debajo)**

| Enfermedades relevantes | Conocido desde | ¿Continua presente?<br>SÍ NO |                          |
|-------------------------|----------------|------------------------------|--------------------------|
|                         |                | <input type="checkbox"/>     | <input type="checkbox"/> |
|                         |                | <input type="checkbox"/>     | <input type="checkbox"/> |
|                         |                | <input type="checkbox"/>     | <input type="checkbox"/> |
|                         |                | <input type="checkbox"/>     | <input type="checkbox"/> |
|                         |                | <input type="checkbox"/>     | <input type="checkbox"/> |

ID PACIENTE | | | | | | | |

**Tuberculosis**

Vacunación BCG  Si → ¿Tiene cicatriz?  Si  No  
 No

Test Tuberculina  No realizado → (1)  
 Realizado → (2)

(1)

Fecha realización: \_\_\_ / \_\_\_ / \_\_\_\_\_ Fecha lectura: \_\_\_ / \_\_\_ / \_\_\_\_\_

Resultado (mm) \_\_\_\_\_

Se considera:  Positivo → (3)  
 Negativo → "Se puede incluir como ITBL negativo"

(2)

¿El resultado fue?  Negativo → ¿Hace menos de 6 meses?  
 Si → "Se puede incluir como ITBL negativo"  
 No → "Se debe volver a realizar el test" (1)  
 Positivo → ¿Hace más de 5 años?  
 Si → "Se debe volver a realizar el test" (1)  
 No → (3)

(3)

Radiografía de tórax: Fecha realización: \_\_\_ / \_\_\_ / \_\_\_\_\_

¿Presenta tuberculosis?  Si → "No puede participar en el estudio. Según el protocolo, el candidato debe derivarse a Urgencias"

¿Presenta tuberculosis?  No → "Se puede incluir como ITBL positivo"

ID PACIENTE | | | | | | | |

**Criterios de inclusión / exclusión**

| <b>Criterios de inclusión</b>                                    | <b>SI</b>                | <b>NO</b>                |
|------------------------------------------------------------------|--------------------------|--------------------------|
| 1. Firma del consentimiento informado.                           | <input type="checkbox"/> | <input type="checkbox"/> |
| 2. Mujer u hombre con edad igual o superior a 18 años.           | <input type="checkbox"/> | <input type="checkbox"/> |
| 3. Disponibilidad para cumplir los requerimientos del protocolo. | <input type="checkbox"/> | <input type="checkbox"/> |

| <b>Criterios de exclusión</b>                                                                                                                                                                                       | <b>SI</b>                | <b>NO</b>                |
|---------------------------------------------------------------------------------------------------------------------------------------------------------------------------------------------------------------------|--------------------------|--------------------------|
| 1. Pacientes infectados por el VIH.                                                                                                                                                                                 | <input type="checkbox"/> | <input type="checkbox"/> |
| 2. Inmunodeficiencias conocidas.                                                                                                                                                                                    | <input type="checkbox"/> | <input type="checkbox"/> |
| 3. Mujeres embarazadas o en período de lactancia materna.                                                                                                                                                           | <input type="checkbox"/> | <input type="checkbox"/> |
| 4. Tuberculosis activa.                                                                                                                                                                                             | <input type="checkbox"/> | <input type="checkbox"/> |
| 5. Participación en otro ensayo clínico.                                                                                                                                                                            | <input type="checkbox"/> | <input type="checkbox"/> |
| 6. Intolerancia a manitol o sacarosa.                                                                                                                                                                               | <input type="checkbox"/> | <input type="checkbox"/> |
| 7. Administración crónica de: metotrexato, azatioprina, ciclofosfamida, corticosteroides orales y otras terapias inmunosupresoras o inmunomoduladores.                                                              | <input type="checkbox"/> | <input type="checkbox"/> |
| 8. Administración de productos sanguíneos o derivados de la sangre durante los 6 meses previos a la aleatorización.                                                                                                 | <input type="checkbox"/> | <input type="checkbox"/> |
| 9. Detección por parte del investigador de falta de conocimiento o voluntad para participar y cumplir con todos los requerimientos.                                                                                 | <input type="checkbox"/> | <input type="checkbox"/> |
| 10. Cualquier otro criterio que el investigador piense que pueda comprometer el cumplimiento del protocolo o influenciar significativamente en la interpretación o en los resultados de los efectos del probiótico. | <input type="checkbox"/> | <input type="checkbox"/> |

**Aleatorización**

Fecha de aleatorización: \_\_\_ / \_\_\_ / \_\_\_\_\_

Número de kit asignado al sujeto: \_\_\_\_\_ (según tabla de aleatorización para ITBL + o -)

¿Se requiere sustituir el kit?  No Si → "Llame a la monitora, T. 93 497 84 14"

Motivo de sustitución: (texto largo)

Fecha de sustitución: \_\_\_ / \_\_\_ / \_\_\_\_\_

Nuevo número de kit asignado al sujeto: \_\_\_\_\_

**ENVIAR CONFIRMACIÓN DE ALEATORIZACIÓN POR MAIL A MONITORA ([rescrig@flsida.org](mailto:rescrig@flsida.org)) Y A LAS INVESTIGADORAS.**

|                    |  |  |  |  |  |  |  |  |  |
|--------------------|--|--|--|--|--|--|--|--|--|
| <b>ID PACIENTE</b> |  |  |  |  |  |  |  |  |  |
|--------------------|--|--|--|--|--|--|--|--|--|

**Visita médica: signos vitales y exploración física**

|                                                  | Basal (día 0)                                                                                                   |         | Semana 1                                                                                              |         | Semana 2                                                                                              |         | Semana 6                                                                                              |         |
|--------------------------------------------------|-----------------------------------------------------------------------------------------------------------------|---------|-------------------------------------------------------------------------------------------------------|---------|-------------------------------------------------------------------------------------------------------|---------|-------------------------------------------------------------------------------------------------------|---------|
| Fecha exploración                                | ___ / ___ / _____                                                                                               |         | ___ / ___ / _____                                                                                     |         | ___ / ___ / _____                                                                                     |         | ___ / ___ / _____                                                                                     |         |
| Talla (m)                                        |                                                                                                                 |         |                                                                                                       |         |                                                                                                       |         |                                                                                                       |         |
| Peso (Kg)                                        |                                                                                                                 |         |                                                                                                       |         |                                                                                                       |         |                                                                                                       |         |
| TAS (mmHg)                                       |                                                                                                                 |         |                                                                                                       |         |                                                                                                       |         |                                                                                                       |         |
| TAD (mmHg)                                       |                                                                                                                 |         |                                                                                                       |         |                                                                                                       |         |                                                                                                       |         |
| Frec. Cardiaca (puls/min)                        |                                                                                                                 |         |                                                                                                       |         |                                                                                                       |         |                                                                                                       |         |
| Frec. Respiratoria (respiraciones/min)           |                                                                                                                 |         |                                                                                                       |         |                                                                                                       |         |                                                                                                       |         |
| Exploración física                               | <input type="checkbox"/>                                                                                        | Normal  | <input type="checkbox"/>                                                                              | Normal  | <input type="checkbox"/>                                                                              | Normal  | <input type="checkbox"/>                                                                              | Normal  |
|                                                  | <input type="checkbox"/>                                                                                        | Anormal | <input type="checkbox"/>                                                                              | Anormal | <input type="checkbox"/>                                                                              | Anormal | <input type="checkbox"/>                                                                              | Anormal |
| Si la exploración física es anormal, especificar |                                                                                                                 |         |                                                                                                       |         |                                                                                                       |         |                                                                                                       |         |
| ¿Existe algún hallazgo relevante?                | <input type="checkbox"/> No<br><input type="checkbox"/> Si → "Inclúyalo como condición basal en "antecedentes"" |         | <input type="checkbox"/> No<br><input type="checkbox"/> Si → "Inclúyalo como acontecimiento adverso"" |         | <input type="checkbox"/> No<br><input type="checkbox"/> Si → "Inclúyalo como acontecimiento adverso"" |         | <input type="checkbox"/> No<br><input type="checkbox"/> Si → "Inclúyalo como acontecimiento adverso"" |         |

**Analítica**

| <b>Hematología</b>                             |                                                                                                                 |  |                                                                                                       |  |                                                                                                       |  |                                                                                                       |  |
|------------------------------------------------|-----------------------------------------------------------------------------------------------------------------|--|-------------------------------------------------------------------------------------------------------|--|-------------------------------------------------------------------------------------------------------|--|-------------------------------------------------------------------------------------------------------|--|
|                                                | Basal (día 0)                                                                                                   |  | Semana 1                                                                                              |  | Semana 2                                                                                              |  | Semana 6                                                                                              |  |
| Fecha de extracción:                           | ___ / ___ / _____                                                                                               |  | ___ / ___ / _____                                                                                     |  | ___ / ___ / _____                                                                                     |  | ___ / ___ / _____                                                                                     |  |
| Leucocitos (x10 <sup>9</sup> /L)               |                                                                                                                 |  |                                                                                                       |  |                                                                                                       |  |                                                                                                       |  |
| Hematíes (x10 <sup>12</sup> /L)                |                                                                                                                 |  |                                                                                                       |  |                                                                                                       |  |                                                                                                       |  |
| Hemoglobina (g/dL)                             |                                                                                                                 |  |                                                                                                       |  |                                                                                                       |  |                                                                                                       |  |
| Hematocrito (%)                                |                                                                                                                 |  |                                                                                                       |  |                                                                                                       |  |                                                                                                       |  |
| Plaquetas (x10 <sup>9</sup> /L)                |                                                                                                                 |  |                                                                                                       |  |                                                                                                       |  |                                                                                                       |  |
| ¿Existe algún hallazgo clínicamente relevante? | <input type="checkbox"/> No<br><input type="checkbox"/> Si → "Inclúyalo como condición basal en "antecedentes"" |  | <input type="checkbox"/> No<br><input type="checkbox"/> Si → "Inclúyalo como acontecimiento adverso"" |  | <input type="checkbox"/> No<br><input type="checkbox"/> Si → "Inclúyalo como acontecimiento adverso"" |  | <input type="checkbox"/> No<br><input type="checkbox"/> Si → "Inclúyalo como acontecimiento adverso"" |  |



ID PACIENTE | 3 | 0 | 0 | \_ | \_ | \_ | \_ | \_ | \_ | \_ | \_

## FINALIZACIÓN DEL ESTUDIO

Fecha de finalización: \_\_\_ / \_\_\_ / \_\_\_\_\_

¿Se trata de una finalización prematura?  Sí  No**En caso afirmativo, por favor, indique el motivo:**

- Pérdida de seguimiento
- Muerte → Fecha de la muerte: \_\_\_ / \_\_\_ / \_\_\_\_\_
- Proceso o enfermedad intercurrente que en opinión del investigador requiere la retirada.
- Desviación o incumplimiento del protocolo
- Abandono voluntario (retirada de consentimiento)
- Acontecimiento adverso

¿El sujeto ha tomado menos de 5 dosis de tratamiento?  Sí  No

**ENVIAR CONFIRMACIÓN DE FINALIZACIÓN PREMATURA POR MAIL A MONITORA ([rescrig@flsida.org](mailto:rescrig@flsida.org)) Y A LAS INVESTIGADORAS.**

|                                                            |
|------------------------------------------------------------|
| <b>ID PACIENTE</b>   3   0   0   _   _   _   _   _   _   _ |
|------------------------------------------------------------|

|                                 |                                         |  |  |  |  |  |  |  |  |  |  |  |  |  |  |
|---------------------------------|-----------------------------------------|--|--|--|--|--|--|--|--|--|--|--|--|--|--|
| <b>Tratamiento concomitante</b> | <b>Nombre genérico de la medicación</b> |  |  |  |  |  |  |  |  |  |  |  |  |  |  |
|                                 | <b>Dosis diaria</b>                     |  |  |  |  |  |  |  |  |  |  |  |  |  |  |
|                                 | <b>Vía (*)</b>                          |  |  |  |  |  |  |  |  |  |  |  |  |  |  |
|                                 | <b>Fecha de inicio</b>                  |  |  |  |  |  |  |  |  |  |  |  |  |  |  |
|                                 | <b>Fecha de fin</b>                     |  |  |  |  |  |  |  |  |  |  |  |  |  |  |
|                                 | <b>Indicación</b>                       |  |  |  |  |  |  |  |  |  |  |  |  |  |  |
|                                 |                                         |  |  |  |  |  |  |  |  |  |  |  |  |  |  |
|                                 |                                         |  |  |  |  |  |  |  |  |  |  |  |  |  |  |
|                                 |                                         |  |  |  |  |  |  |  |  |  |  |  |  |  |  |
|                                 |                                         |  |  |  |  |  |  |  |  |  |  |  |  |  |  |
|                                 |                                         |  |  |  |  |  |  |  |  |  |  |  |  |  |  |
|                                 |                                         |  |  |  |  |  |  |  |  |  |  |  |  |  |  |
|                                 |                                         |  |  |  |  |  |  |  |  |  |  |  |  |  |  |
|                                 |                                         |  |  |  |  |  |  |  |  |  |  |  |  |  |  |

(\*) Vía de administración:

- PO = vía oral
- TO = tópica
- IM = intramuscular
- IH = inhalación
- SC = subcutánea
- IV = intravenosa
- VR = vía rectal

ID PACIENTE | 3 | 0 | 0 | | | | | | | | | |

**Acontecimientos adversos INCLUIR DEFINICIONES EN EL CRD ELECTRÓNICO (SIGUIENTE PÁGINA)**

| Descripción del AA                                                             | Fecha del AA |            | Intensidad del AA | Terapia para el AA | Actitud tomada con el tratamiento en estudio | ¿Fue grave? | Relación causal con la medicación en estudio y esperabilidad                                                                                                  |                              |
|--------------------------------------------------------------------------------|--------------|------------|-------------------|--------------------|----------------------------------------------|-------------|---------------------------------------------------------------------------------------------------------------------------------------------------------------|------------------------------|
|                                                                                | Inicio       | Resolución |                   |                    |                                              |             | 1: Definitiva<br>2: Probable<br>3: Posible<br>4: Improbable                                                                                                   | 0: Esperado<br>1: Inesperado |
| 1.                                                                             |              |            |                   |                    |                                              |             |                                                                                                                                                               |                              |
| 2.                                                                             |              |            |                   |                    |                                              |             |                                                                                                                                                               |                              |
| 3.                                                                             |              |            |                   |                    |                                              |             |                                                                                                                                                               |                              |
| 4.                                                                             |              |            |                   |                    |                                              |             |                                                                                                                                                               |                              |
| 5.                                                                             |              |            |                   |                    |                                              |             |                                                                                                                                                               |                              |
| 6.                                                                             |              |            |                   |                    |                                              |             |                                                                                                                                                               |                              |
| Descripción del AA (si es necesario), utilizando el número de línea de arriba. |              |            |                   |                    |                                              |             | <p><b>EN CASO DE SAE, ENVIAR NOTIFICACIÓN POR MAIL A LA MONITORA (<a href="mailto:rescrig@fisida.org">rescrig@fisida.org</a>) Y A LAS INVESTIGADORAS.</b></p> |                              |

ID PACIENTE | 3 | 0 | 0 | \_ | \_ | \_ | \_ | \_ | \_ | \_ |

## DEFINICIONES

### Intensidad del AA

**Leve:** Acontecimiento que causa una interferencia nula o mínima en las actividades funcionales.

**Moderado:** Acontecimiento que causa más que una interferencia mínima en las actividades funcionales.

**Intenso:** Acontecimiento que causa incapacidad para realizar actividades funcionales.

### Relación causal con la medicación en estudio y esperabilidad

#### **Definitiva**

- Existe una secuencia temporal plausible en relación con la administración del tratamiento o con los niveles plasmáticos o tisulares del mismo.
- La manifestación observada coincide con el esquema de acontecimientos adversos conocidos del tratamiento implicado.
- No se puede explicar por enfermedad concurrente o por otros tratamientos o sustancias químicas.
- La respuesta a la retirada tiene que ser clínicamente plausible. O sea mejora al interrumpir la administración del tratamiento.
- El proceso de reexposición tiene que ser positivo.

#### **Posible**

- Existe una secuencia temporal razonable a la exposición del tratamiento.
- Coincide con el esquema de reacciones adversas conocidas.
- Puede ser debida a la situación clínica del sujeto o a otros tratamientos o sustancias químicas administradas concomitantemente.
- La información sobre la retirada puede no existir o ser confusa.

#### **Improbable:**

- Un acontecimiento clínico, incluidas anomalías en las pruebas de laboratorio, con una relación temporal respecto a la administración del tratamiento que hace improbable la relación de causalidad, y en el que otros tratamientos, sustancias químicas o enfermedad intercurrente proporcionan explicaciones plausibles.

#### **No relacionado**

No cumple ninguno de los criterios mencionados.

### Acontecimiento Adverso Grave

1: Produce la muerte.

2: Pone en peligro la vida.

3: Precisa de ingreso hospitalario o lo prolonga.

4: Produce una discapacidad / incapacidad persistente o importante, así como una anomalía o defecto congénito.

5: Es un acontecimiento no incluido en los anteriores puntos, pero que, a criterio del investigador, puede poner en peligro al sujeto o puede requerir intervención para prevenir cualquiera de los anteriores resultados mencionados.
