# Supplementary material for: Pilot, double-blind, randomized, placebo-controlled clinical trial of the supplement food Nyaditum resae® in adults with or without latent TB infection: Safety and immunogenicity
Source: PubMed Central journal article supplement (PMC5300153; doi:10.1371/journal.pone.0171294), 2017-02-09
Supplement: pone.0171294.s007.pdf [file pone.0171294.s007.pdf]

# DIARIO DEL PARTICIPANTE PROTOCOLO NYADATREG

**ID Paciente:** \_\_\_\_\_

## PERSONAS DE CONTACTO

Dra. Ana M<sup>a</sup> Barriocanal Barriocanal

Dra. Eva Montané Esteva

Servicio de Farmacología Clínica

Hospital Universitari Germans Trias i Pujol

Telf. 93 497 88 65 / 93 497 84 88

## INFORMACIÓN PARA RELLENAR EL DIARIO

- Utilice bolígrafo
- Rellene todas las casillas (aunque no haya tenido ningún síntoma)
- En caso de presentar alguna reacción grado 3 contacte con el equipo investigador
- Devuelva el diario en su próxima visita

**Semana** \_\_\_\_\_

|                                |  |  |  |  |  |  |  |  |  |  |  |  |  |  |  |  |  |  |  |  |
|--------------------------------|--|--|--|--|--|--|--|--|--|--|--|--|--|--|--|--|--|--|--|--|
| <b>Fecha de la toma</b>        |  |  |  |  |  |  |  |  |  |  |  |  |  |  |  |  |  |  |  |  |
| <b>Hora de la toma</b>         |  |  |  |  |  |  |  |  |  |  |  |  |  |  |  |  |  |  |  |  |
| <b>Deposiciones (Nº / día)</b> |  |  |  |  |  |  |  |  |  |  |  |  |  |  |  |  |  |  |  |  |
| <b>Náuseas (0-3)</b>           |  |  |  |  |  |  |  |  |  |  |  |  |  |  |  |  |  |  |  |  |
| <b>Vómitos (0-3)</b>           |  |  |  |  |  |  |  |  |  |  |  |  |  |  |  |  |  |  |  |  |
| <b>Dolor abdominal (0-3)</b>   |  |  |  |  |  |  |  |  |  |  |  |  |  |  |  |  |  |  |  |  |
| <b>Otros</b>                   |  |  |  |  |  |  |  |  |  |  |  |  |  |  |  |  |  |  |  |  |

0= Normal

1= Leve. Síntoma que causa una interferencia nula o mínima en las actividades funcionales.

2= Moderado. Síntoma que causa más que una interferencia mínima en las actividades funcionales.

3= Intenso. Síntoma que causa incapacidad para realizar actividades funcionales.

**Semana** \_\_\_\_\_

|                              |  |  |  |  |  |  |  |  |  |  |  |  |  |  |  |  |  |  |  |  |
|------------------------------|--|--|--|--|--|--|--|--|--|--|--|--|--|--|--|--|--|--|--|--|
| <b>Fecha de la toma</b>      |  |  |  |  |  |  |  |  |  |  |  |  |  |  |  |  |  |  |  |  |
| <b>Hora de la toma</b>       |  |  |  |  |  |  |  |  |  |  |  |  |  |  |  |  |  |  |  |  |
| <b>Deposiciones (Nº/día)</b> |  |  |  |  |  |  |  |  |  |  |  |  |  |  |  |  |  |  |  |  |
| <b>Náuseas (0-3)</b>         |  |  |  |  |  |  |  |  |  |  |  |  |  |  |  |  |  |  |  |  |
| <b>Vómitos (0-3)</b>         |  |  |  |  |  |  |  |  |  |  |  |  |  |  |  |  |  |  |  |  |
| <b>Dolor abdominal (0-3)</b> |  |  |  |  |  |  |  |  |  |  |  |  |  |  |  |  |  |  |  |  |
| <b>Otros</b>                 |  |  |  |  |  |  |  |  |  |  |  |  |  |  |  |  |  |  |  |  |

0= Normal

1= Leve. Síntoma que causa una interferencia nula o mínima en las actividades funcionales.

2= Moderado. Síntoma que causa más que una interferencia mínima en las actividades funcionales.

3= Intenso. Síntoma que causa incapacidad para realizar actividades funcionales.
